# Supplementary material
Source: PubMed Central journal article supplement (PMC7025890)

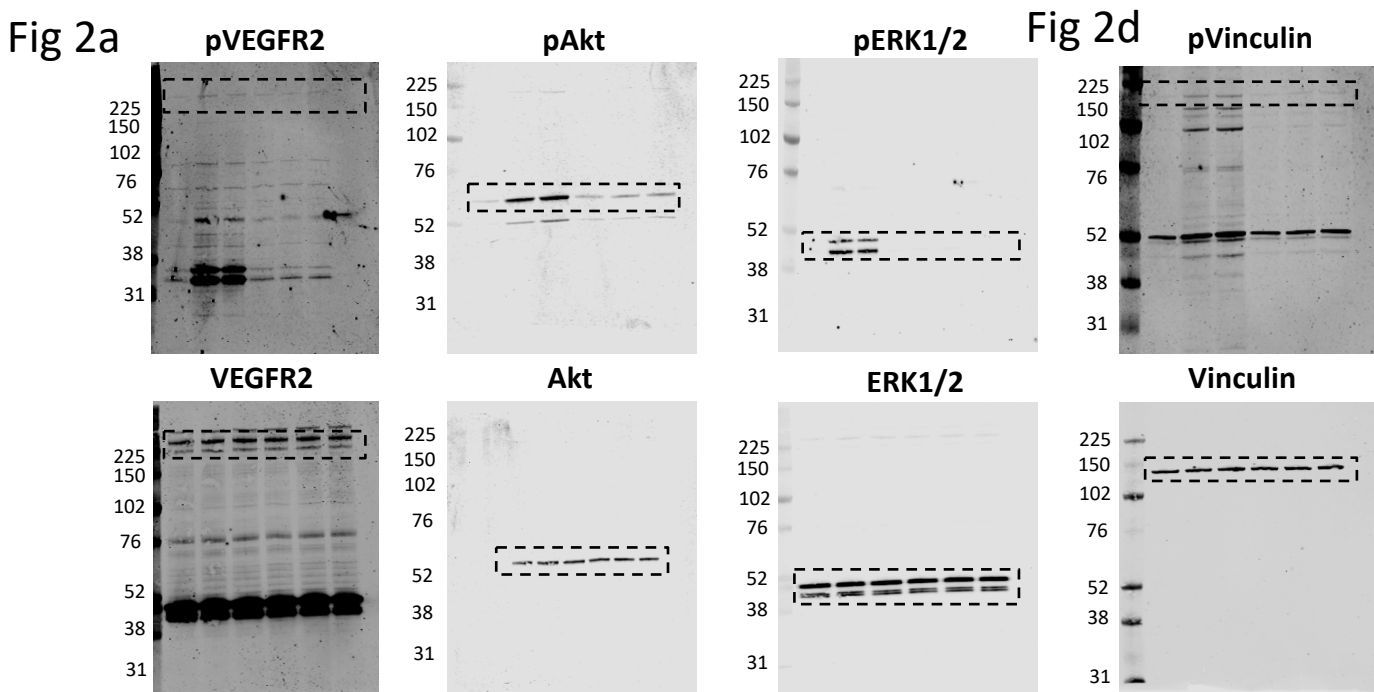

**Fig 3b**

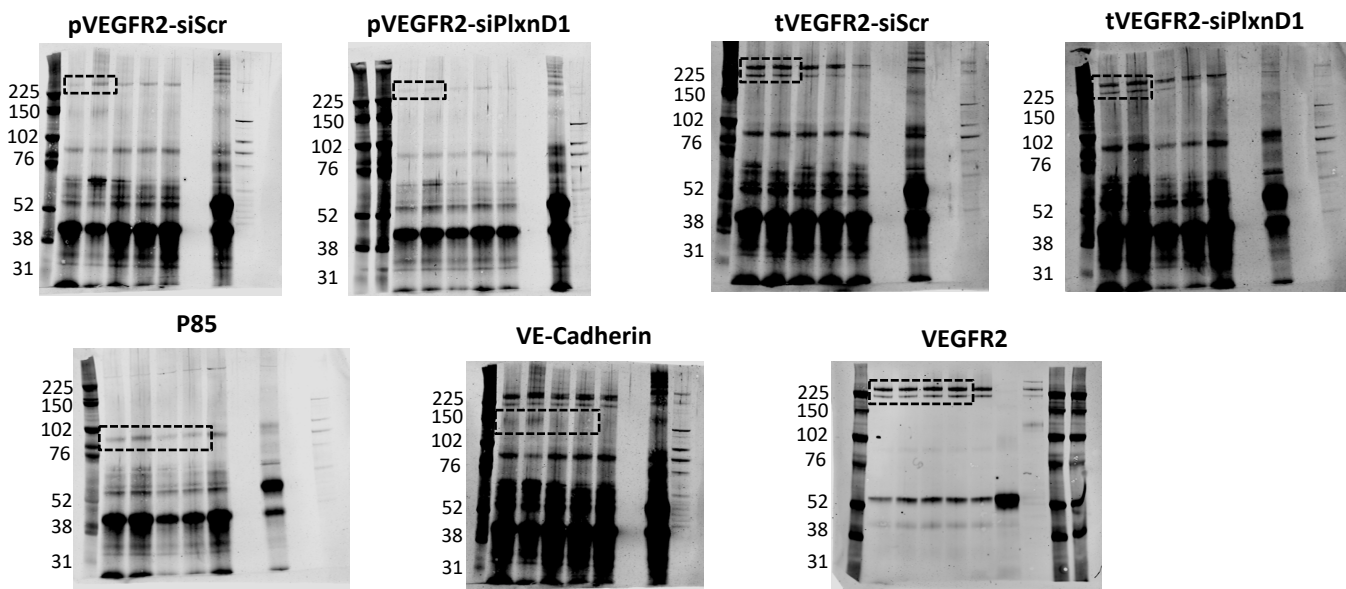

**Fig 3c**

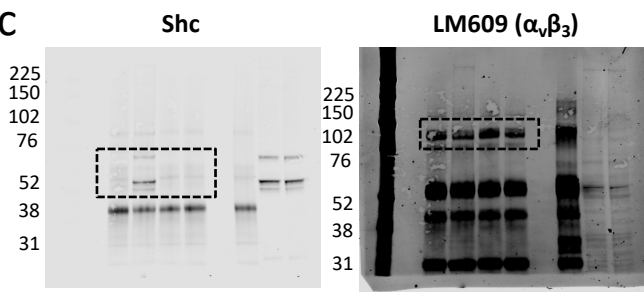

**Fig 3d**

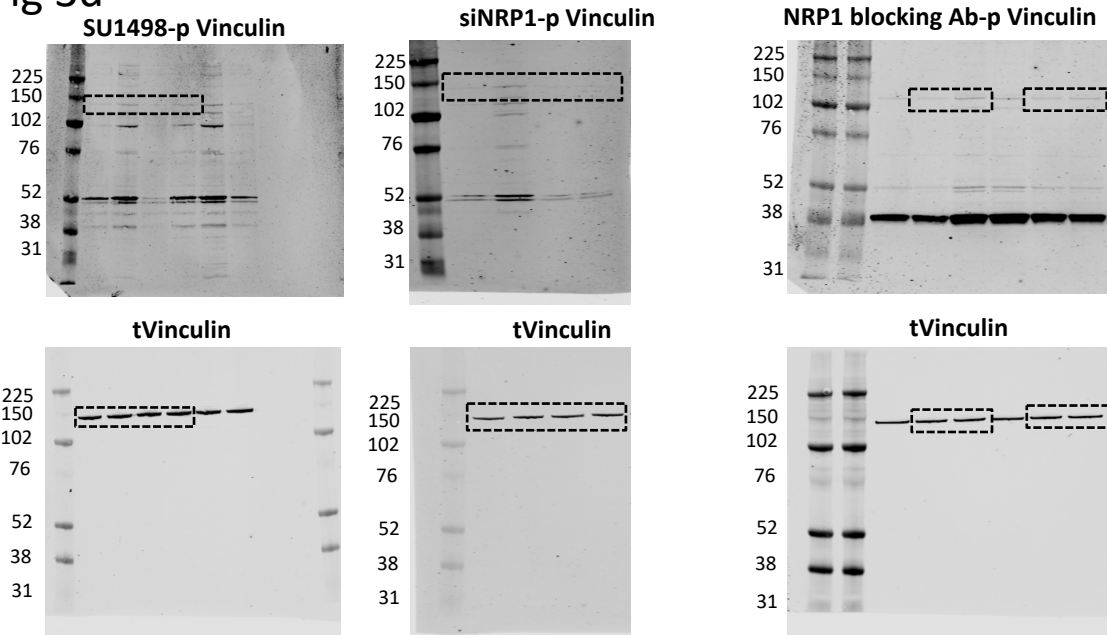

**Fig 3e**

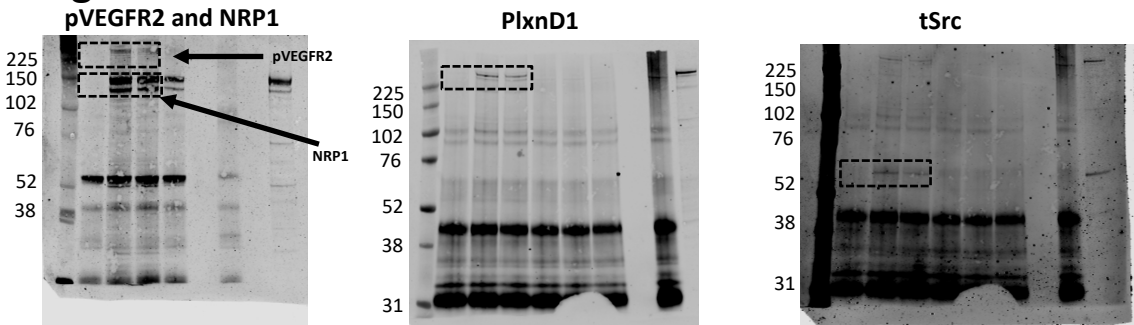

**Fig 3f**

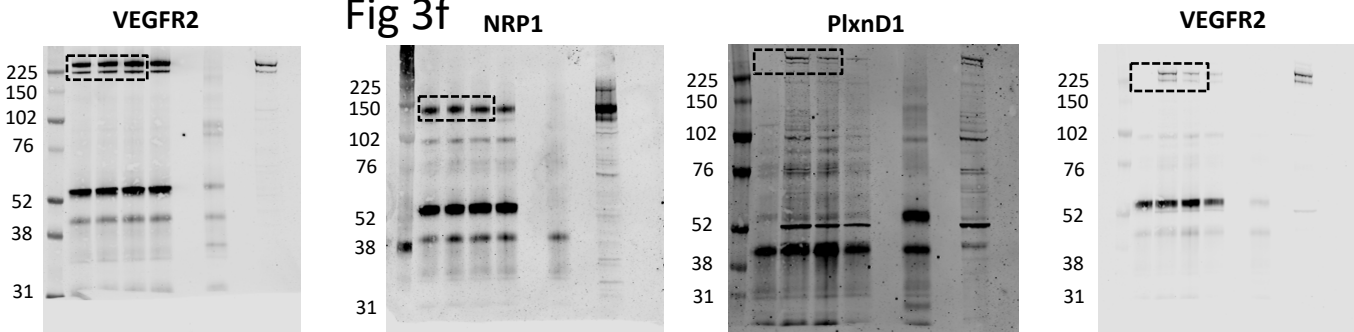

Fig 3g

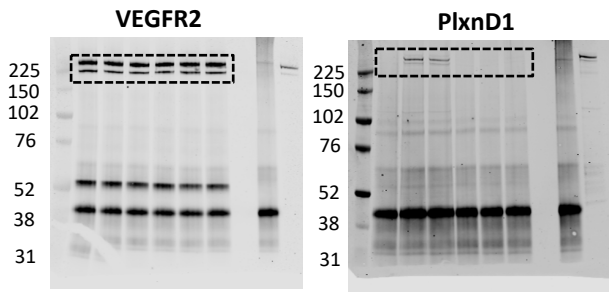

Fig 3i

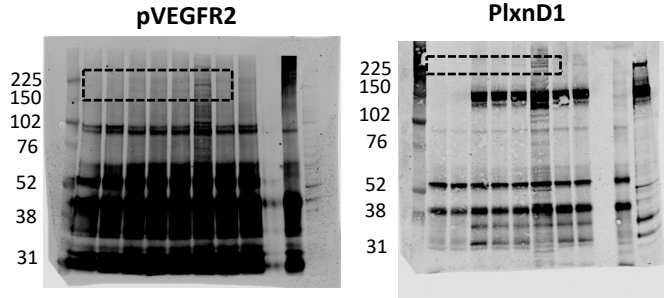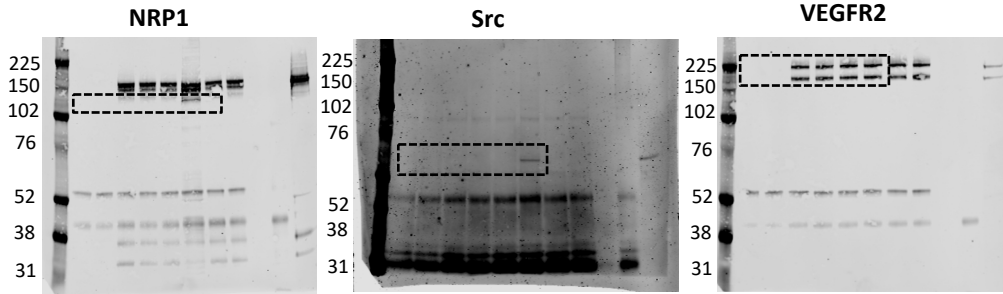

Fig 4g

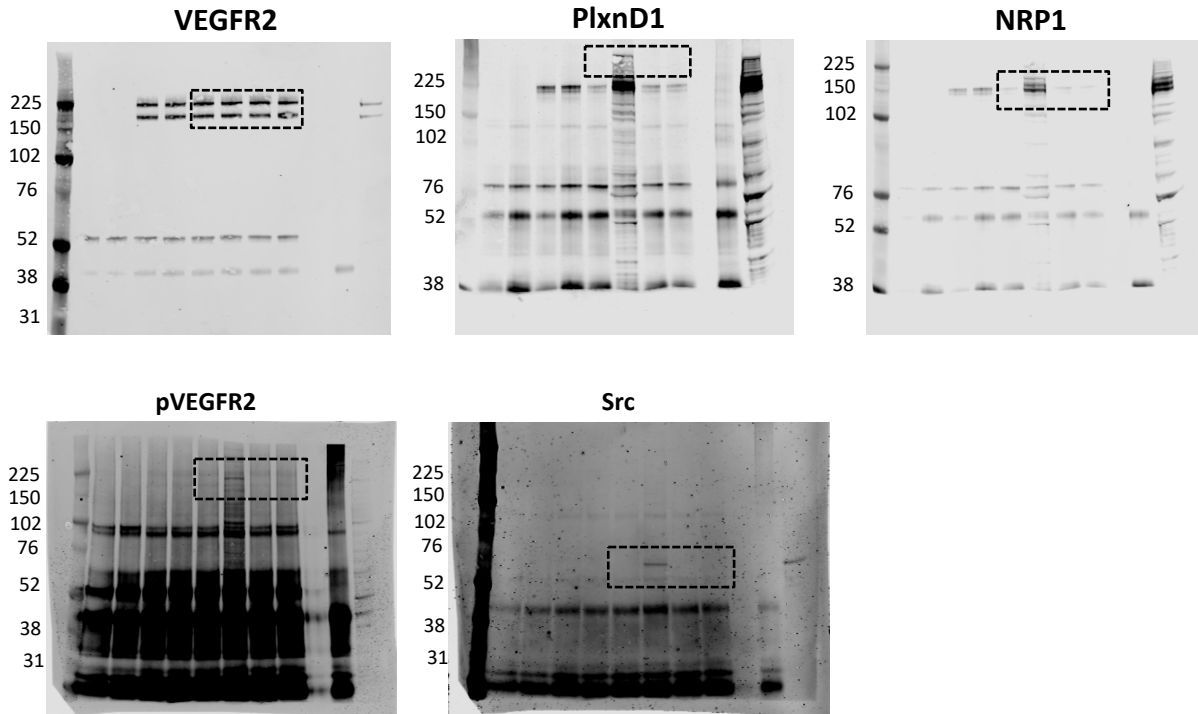

Fig 4h

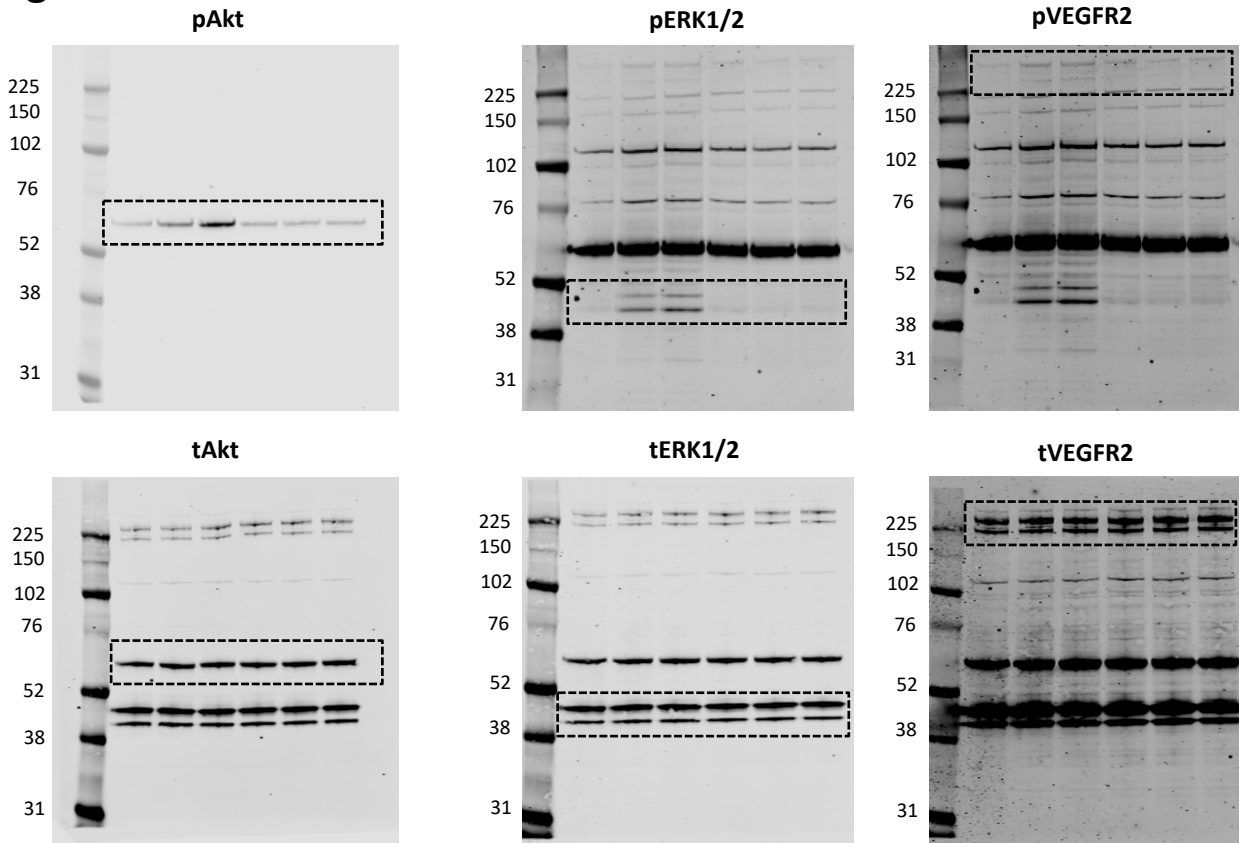

Fig 4i

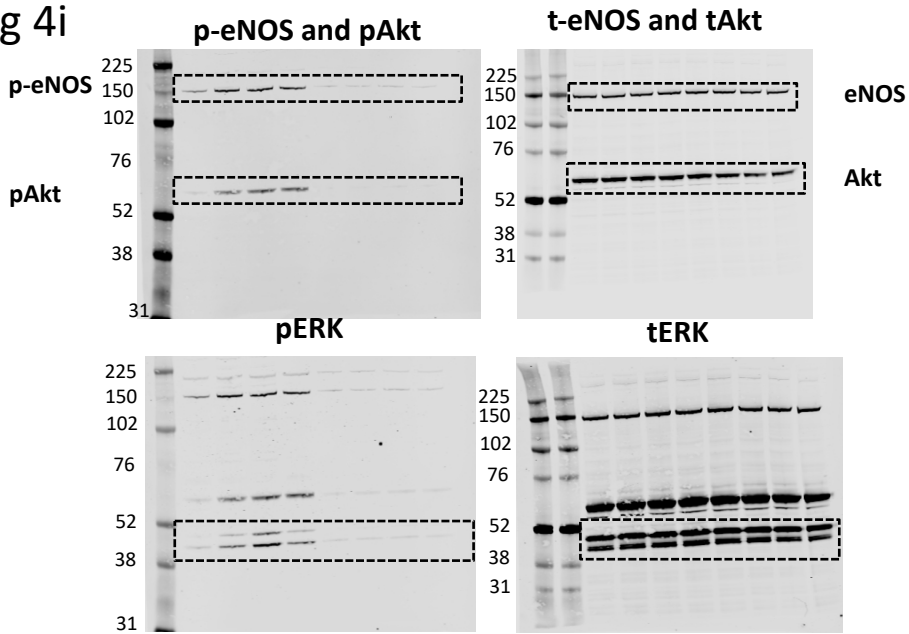

# Extended Figure 1

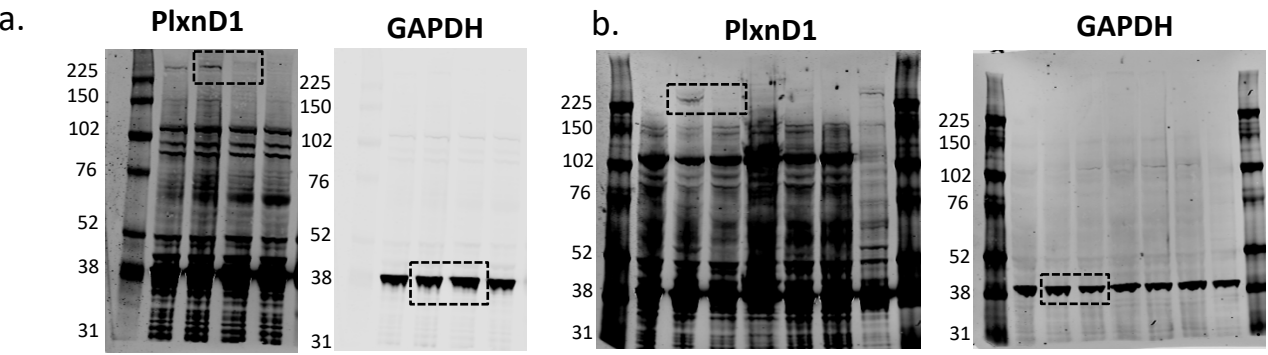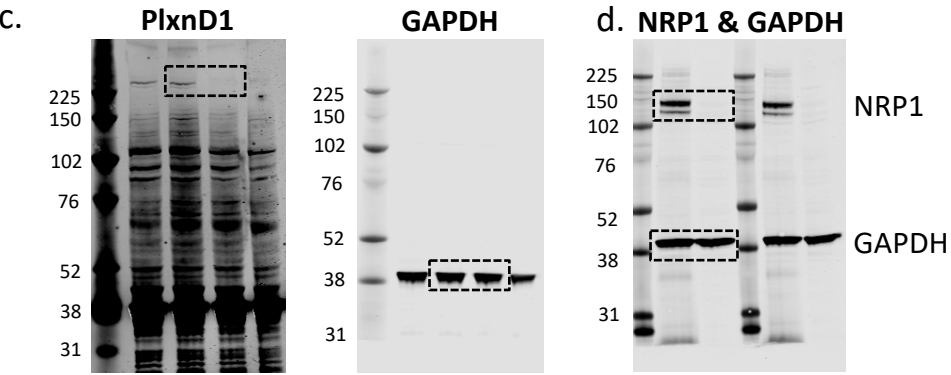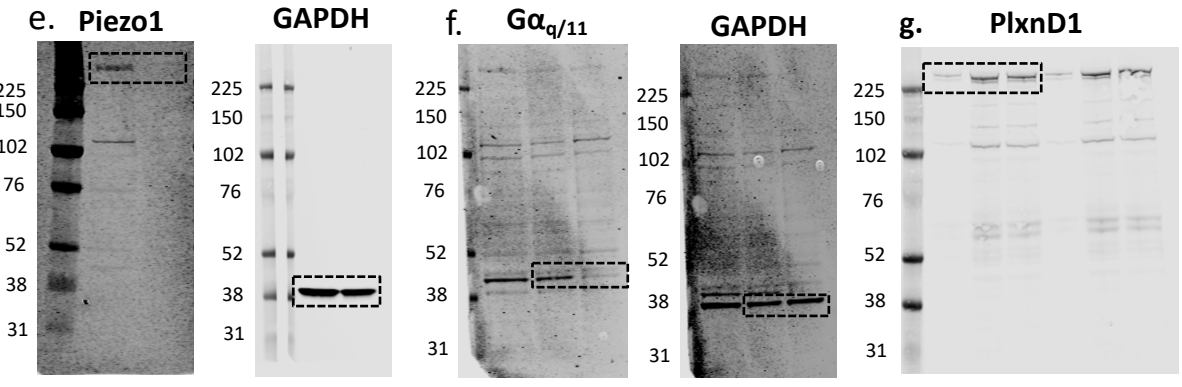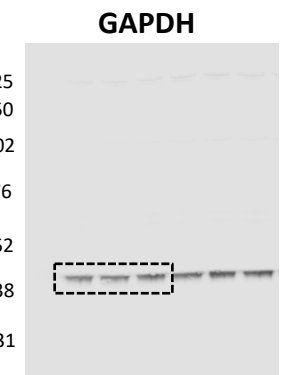

### Extended Figure 2a

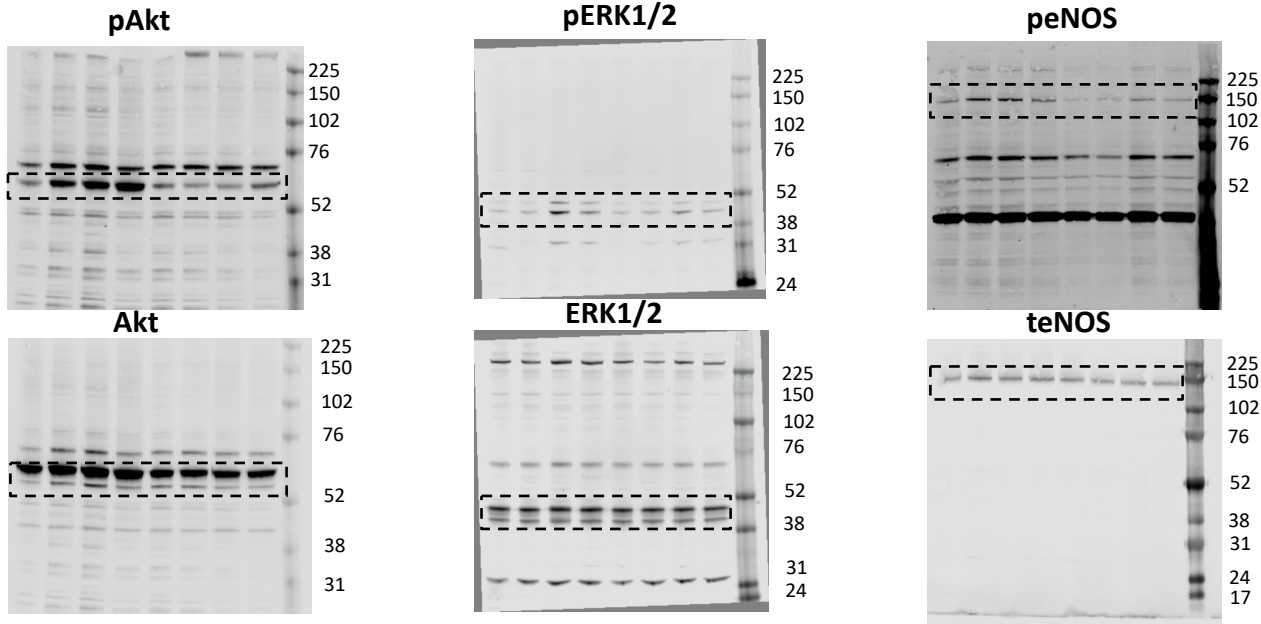

### Extended Figure 3a

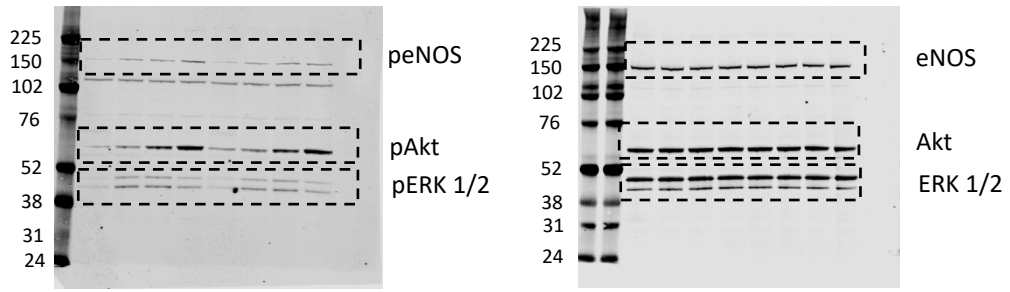

### Extended Figure 7d

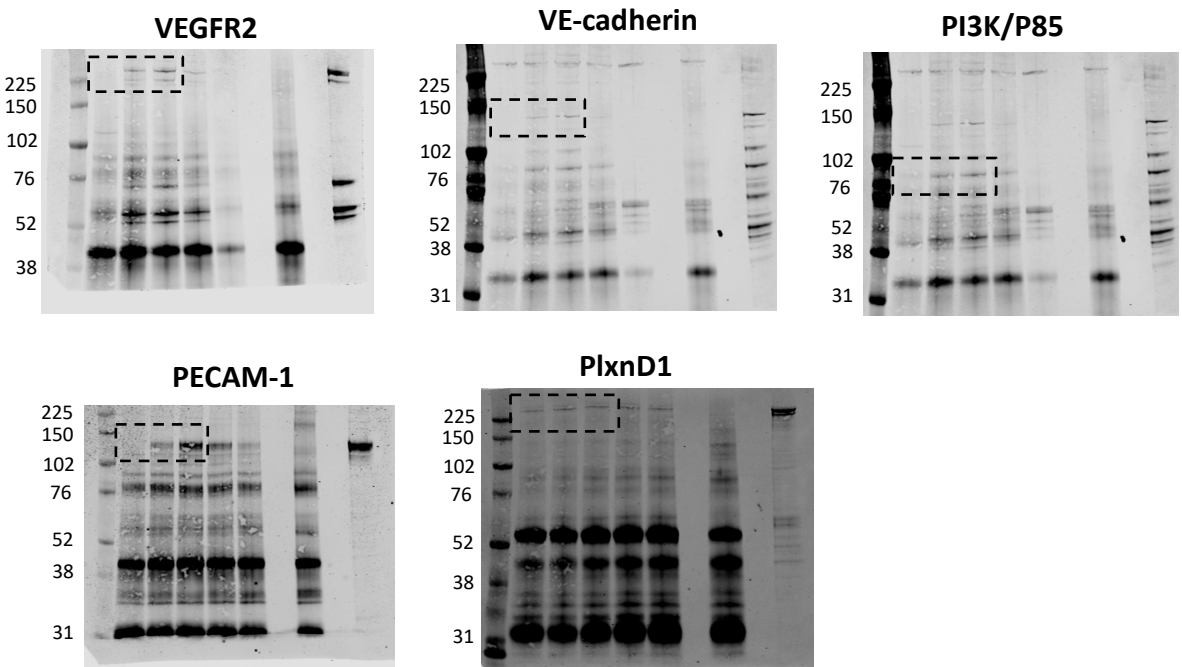

# Extended Figure 8

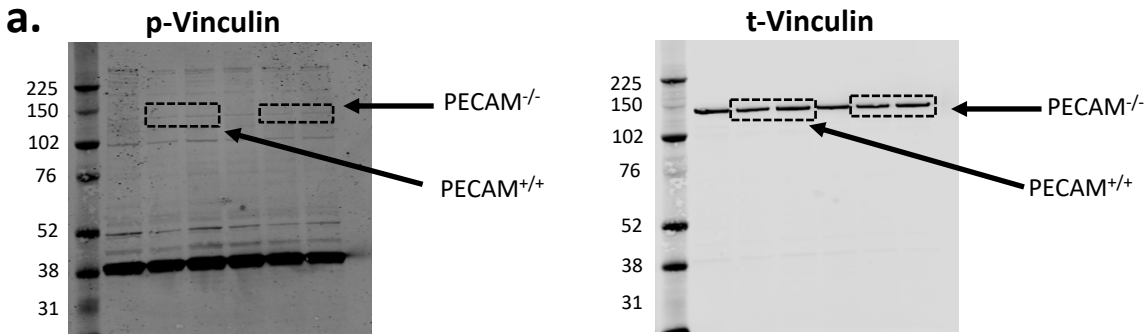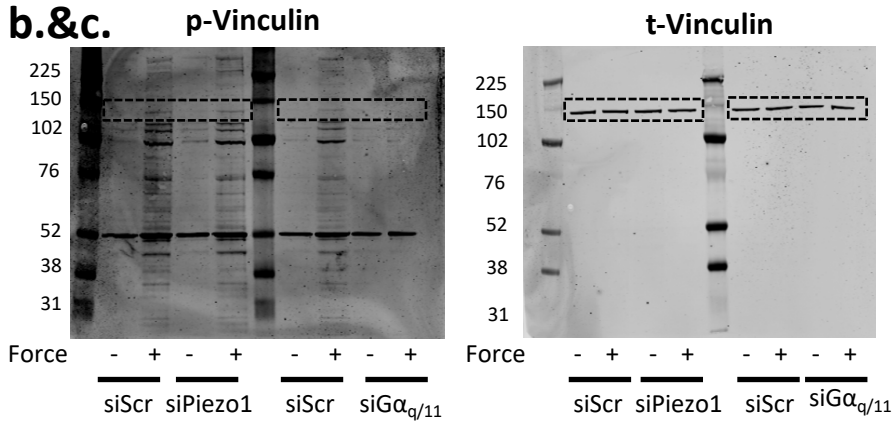

# Extended Figure 9 (a. & b.)

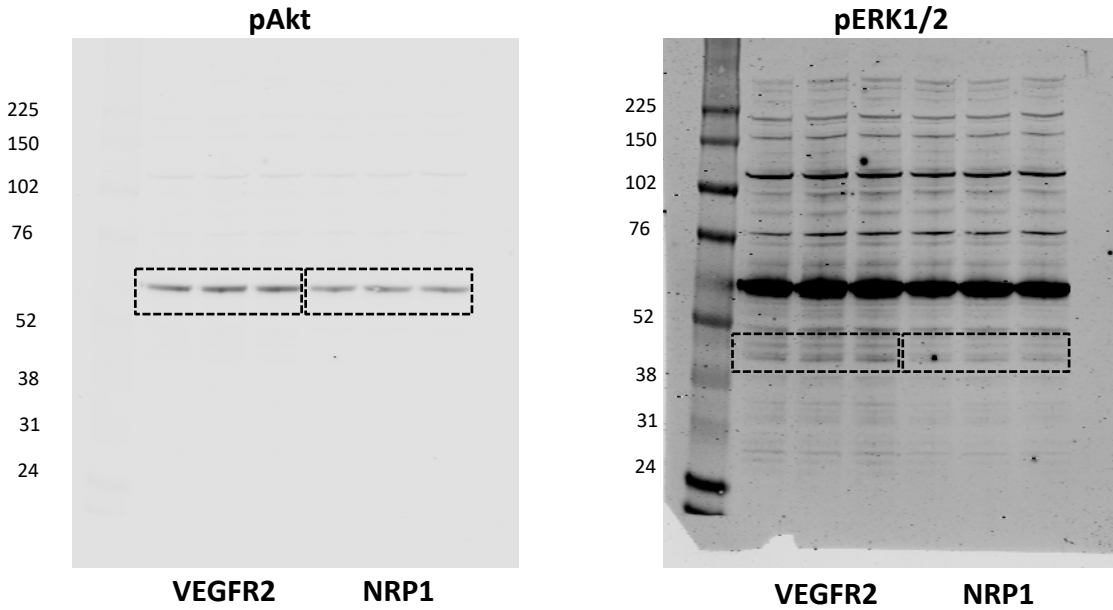

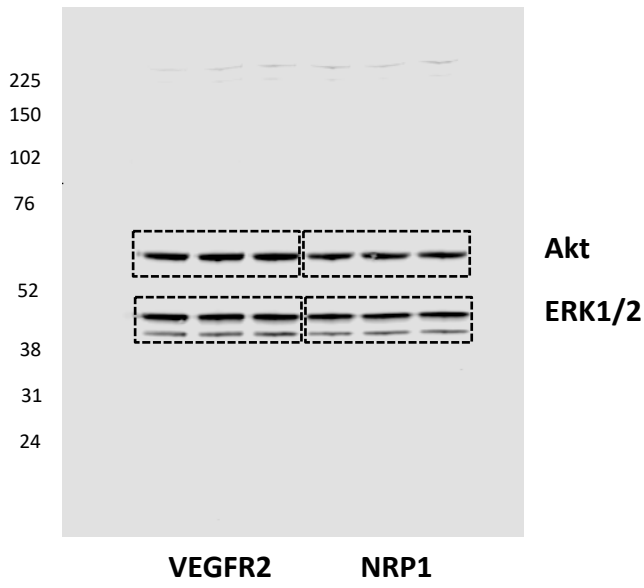

Extended Figure 11

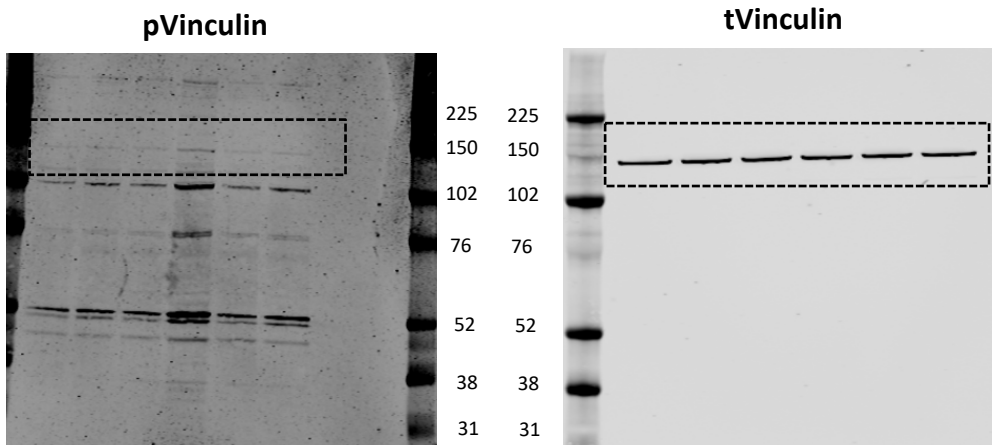

Supplement: EMS85132-supplement-Supplementary_file_1.pdf [file EMS85132-supplement-Supplementary_file_1.pdf]
